# Supplementary material for: Virological Traits of the SARS-CoV-2 BA.2.87.1 Lineage
Source: MDPI journal article supplement (doi:10.3390/vaccines12050487), 2024-05-01
Supplement: s1 [file s1]

**Supplementary Table S1: Information on plasma samples**

| General information |        |        |             |                                           |                           | Vaccination status                                                                                      | Infection status  |                      |                                                    |
|---------------------|--------|--------|-------------|-------------------------------------------|---------------------------|---------------------------------------------------------------------------------------------------------|-------------------|----------------------|----------------------------------------------------|
| Sample ID           | Cohort | Gender | Age (years) | Days since last immunization <sup>a</sup> | IgG (BAU/ml) <sup>b</sup> | Vaccination history                                                                                     | Infected (Yes/No) | Date of infection(s) | Most prevalent lineage(s) at the time of infection |
| 10170               | 1      | Female | 26          | 15                                        | 6627                      | V#1: Yes (n.i.); V#2: Yes (n.i.); V#3: Yes (n.i.); V#4: BNT (B.1/BA.5); V#5: BNT (XBB.1.5)              | No                | n.a.                 | n.a.                                               |
| 10179               | 1      | Female | 30          | 16                                        | 5110                      | V#1: BNT (B.1); V#2: BNT (B.1); V#3: BNT (B.1); V#4: BNT (B.1); V#5: BNT (XBB.1.5)                      | No                | n.a.                 | n.a.                                               |
| 10182               | 1      | Female | 42          | 15                                        | 2125                      | V#1: BNT (B.1); V#2: BNT (B.1); V#3: BNT (B.1); V#4: BNT (B.1/BA.5); V#5: BNT (XBB.1.5)                 | No                | n.a.                 | n.a.                                               |
| 10186               | 1      | Male   | 74          | 15                                        | 1882                      | V#1: AZD; V#2: AZD; V#3: BNT (B.1); V#4: MOD (B.1); V#5: BNT (XBB.1.5)                                  | No                | n.a.                 | n.a.                                               |
| 10192               | 1      | Female | 48          | 16                                        | 3523                      | V#1: BNT (B.1); V#2: BNT (B.1); V#3: BNT (B.1); V#4: BNT (B.1/BA.5); V#5: BNT (XBB.1.5)                 | No                | n.a.                 | n.a.                                               |
| 10194               | 1      | Male   | 61          | 16                                        | 1114                      | V#1: BNT (B.1); V#2: BNT (B.1); V#3: BNT (B.1); V#4: BNT (B.1); V#5: BNT (XBB.1.5)                      | No                | n.a.                 | n.a.                                               |
| 10197               | 1      | Female | 57          | 16                                        | 2531                      | V#1: BNT (B.1); V#2: BNT (B.1); V#3: BNT (B.1); V#4: BNT (B.1); V#5: BNT (B.1/BA.5); V#6: BNT (XBB.1.5) | No                | n.a.                 | n.a.                                               |
| 10198               | 1      | Female | 64          | 16                                        | 6560                      | V#1: AZD; V#2: AZD; V#3: BNT (B.1); V#4: BNT (B.1); V#5: BNT (XBB.1.5)                                  | No                | n.a.                 | n.a.                                               |

|       |   |        |    |    |      |                                                                                                                                       |     |            |                          |
|-------|---|--------|----|----|------|---------------------------------------------------------------------------------------------------------------------------------------|-----|------------|--------------------------|
| 10200 | 1 | Male   | 57 | 16 | 2106 | V#1: BNT (B.1); V#2: BNT (B.1); V#3: BNT (B.1); V#4: Yes (n.i.); V#5: Yes (n.i.); V#6: BNT (B.1); V#7: Yes (n.i.); V#8: BNT (XBB.1.5) | No  | n.a.       | n.a.                     |
| 10215 | 1 | Male   | 38 | 16 | 2202 | V#1: BNT (B.1); V#2: BNT (B.1); V#3: BNT (B.1); V#4: BNT (B.1); V#5: BNT (XBB.1.5)                                                    | No  | n.a.       | n.a.                     |
| 10223 | 1 | Female | 25 | 21 | 4461 | V#1: AZD; V#2: AZD; V#3: BNT (B.1); V#4: BNT (B.1/BA.5); V#5: BNT (XBB.1.5)                                                           | No  | n.a.       | n.a.                     |
| 10167 | 2 | Male   | 44 | 16 | 1552 | V#1: BNT (B.1); V#2: BNT (B.1); V#3: BNT (B.1); V#4: BNT (XBB.1.5)                                                                    | Yes | 15.04.2022 | BA.2                     |
| 10172 | 2 | Male   | 50 | 15 | 3066 | V#1: AZD; V#2: BNT (B.1); V#3: BNT (B.1); V#4: BNT (B.1/BA.5); V#5: BNT (XBB.1.5)                                                     | Yes | 15.03.2023 | XBB.1.5, CH.1.1, XBB.1.9 |
| 10178 | 2 | Female | 56 | 15 | 3434 | V#1: BNT (B.1); V#2: BNT (B.1); V#3: BNT (B.1); V#4: BNT (B.1); V#5: BNT (XBB.1.5)                                                    | Yes | 29.07.2022 | BA.5                     |
| 10180 | 2 | Male   | 41 | 16 | 2797 | V#1: AZD; V#2: BNT (B.1); V#3: BNT (B.1); V#4: BNT (B.1/BA.5); V#5: BNT (XBB.1.5)                                                     | Yes | 14.02.2022 | BA.1, BA.2               |
| 10185 | 2 | Female | 62 | 16 | 1690 | V#1: BNT (B.1); V#2: BNT (B.1); V#3: BNT (B.1); V#4: BNT (B.1); V#5: BNT (XBB.1.5)                                                    | Yes | 13.01.2023 | BA.5, CH.1.1, XBB.1.5    |
| 10188 | 2 | Female | 34 | 16 | 1952 | V#1: BNT (B.1); V#2: BNT (B.1); V#3: BNT (B.1); V#4: BNT (B.1); V#5: BNT (XBB.1.5)                                                    | Yes | 07.01.2022 | BA.1                     |
| 10189 | 2 | Female | 45 | 16 | 2467 | V#1: AZD; V#2: BNT (B.1); V#3: BNT (B.1); V#4: BNT (B.1); V#5: BNT (XBB.1.5)                                                          | Yes | 15.07.2022 | BA.5                     |
| 10191 | 2 | Female | 29 | 16 | 1395 | V#1: BNT (B.1); V#2: BNT (B.1); V#3: BNT (B.1); V#4: BNT (XBB.1.5)                                                                    | Yes | 16.02.2022 | BA.1, BA.2               |
| 10201 | 2 | Male   | 43 | 16 | 5395 | V#1: BNT (B.1); V#2: BNT (B.1); V#3: MOD                                                                                              | Yes | 15.03.2022 | BA.1, BA.2               |

|       |   |        |    |       |      |                                                                                             |     |            |                                |
|-------|---|--------|----|-------|------|---------------------------------------------------------------------------------------------|-----|------------|--------------------------------|
|       |   |        |    |       |      | (B.1); V#4: BNT<br>(B.1/BA.5); V#5: BNT<br>(XBB.1.5)                                        |     |            |                                |
| 10208 | 2 | Female | 42 | 15    | 1261 | V#1: BNT (B.1); V#2:<br>BNT (B.1); V#3: BNT<br>(B.1); V#4: BNT (B.1);<br>V#5: BNT (XBB.1.5) | Yes | 26.10.2022 | BA.5                           |
| 10212 | 2 | Female | 31 | 17    | 3446 | V#1: BNT (B.1); V#2:<br>BNT (B.1); V#3: BNT<br>(B.1); V#4: BNT (B.1);<br>V#5: BNT (XBB.1.5) | Yes | 21.05.2022 | BA.2                           |
| 10214 | 2 | Male   | 58 | 15    | 6090 | V#1: AZD; V#2: BNT<br>(B.1); V#3: BNT (B.1);<br>V#4: BNT (XBB.1.5)                          | Yes | 15.03.2023 | XBB.1.5,<br>CH.1.1,<br>XBB.1.9 |
| 10224 | 2 | Male   | 44 | 16    | 1552 | V#1: BNT (B.1); V#2:<br>BNT (B.1); V#3: BNT<br>(B.1); V#4: BNT<br>(XBB.1.5)                 | Yes | 13.05.2022 | BA.2                           |
| 10396 | 3 | Female | 60 | 53    | 3275 | V#1: MOD; V#2: Yes<br>(n.i.); V#3: Yes (n.i.)                                               | Yes | 17.12.2023 | JN.1                           |
| 10410 | 3 | Male   | 31 | 44    | 2796 | V#1: BNT (B.1); V#2:<br>BNT (B.1); V#3: BNT<br>(B.1)                                        | Yes | 27.12.2023 | JN.1                           |
| 10445 | 3 | Female | 56 | 79    | 4973 | V#1: AZD; V#2: Yes<br>(n.i.); V#3: Yes (n.i.);<br>V#3: BNT (B.1/BA.5)                       | Yes | 25.11.2023 | JN.1,<br>BA.2.86.1             |
| 10464 | 3 | Female | 58 | 84    | 3032 | V#1: BNT (B.1); V#2:<br>BNT (B.1); V#3: BNT<br>(B.1)                                        | Yes | 20.11.2023 | JN.1,<br>BA.2.86.1             |
| 10503 | 3 | Female | 64 | 47    | 1597 | V#1: AZD; V#2: BNT<br>(B.1); V#3: BNT (B.1);<br>V#4: BNT (B.1/BA.5)                         | Yes | 28.12.2023 | JN.1                           |
| 10518 | 3 | Female | 38 | 46    | 768  | V#1: AZD; V#2: MOD;<br>V#3: MOD                                                             | Yes | 29.12.2023 | JN.1                           |
| 10543 | 3 | Male   | 50 | 60    | 1522 | V#1: BNT (B.1); V#2:<br>Yes (n.i.); V#3: Yes<br>(n.i.)                                      | Yes | 16.12.2023 | JN.1                           |
| 10620 | 3 | Male   | 58 | 88    | 2074 | V#1: AZD; V#2: BNT<br>(B.1); V#3: BNT (B.1);<br>V#4: BNT (B.1/BA.5)                         | Yes | 19.11.2023 | JN.1,<br>BA.2.86.1             |
| 10642 | 3 | Female | 56 | 69    | 5541 | V#1: BNT (B.1); V#2:<br>Yes (n.i.); V#3: Yes<br>(n.i.); V#4: BNT<br>(B.1/BA.5)              | Yes | 09.12.2023 | JN.1                           |
| 10475 | 4 | Female | 58 | 54    | 5937 | V#1: BNT (B.1); V#2:<br>BNT (B.1); V#3: BNT<br>(B.1)                                        | Yes | 12.03.2022 | BA.1, BA.2                     |
|       |   |        |    |       |      |                                                                                             |     | 20.12.2023 | JN.1                           |
| 10504 | 4 | Female | 56 | 44-74 | 2226 |                                                                                             | Yes | xx.08.2022 | BA.5, BE.1.1                   |

|       |   |        |    |       |      |                                                                       |     |            |                 |
|-------|---|--------|----|-------|------|-----------------------------------------------------------------------|-----|------------|-----------------|
|       |   |        |    |       |      | V#1: BNT (B.1); V#2: BNT (B.1); V#3: BNT (B.1)                        |     | xx.12.2023 | JN.1            |
| 10505 | 4 | Male   | 54 | 44-74 | 882  | V#1: BNT (B.1); V#2: BNT (B.1); V#3: BNT (B.1)                        | Yes | xx.12.2022 | BQ.1.1, BF.7    |
|       |   |        |    |       |      |                                                                       |     | xx.12.2023 | JN.1            |
| 10514 | 4 | Male   | 49 | 81    | 1305 | V#1: BNT (B.1); V#2: Yes (n.i.); V#3: Yes (n.i.); V#4: BNT (B.1/BA.5) | Yes | 15.05.2022 | BA.2            |
|       |   |        |    |       |      |                                                                       |     | 24.11.2023 | JN.1, BA.2.86.1 |
| 10533 | 4 | Female | 57 | 78    | 2647 | V#1: AZD; V#2: BNT (B.1); V#3: BNT (B.1)                              | Yes | 13.09.2022 | BA.5            |
|       |   |        |    |       |      |                                                                       |     | 28.11.2023 | JN.1, BA.2.86.1 |
| 10546 | 4 | Female | 42 | 62    | 1519 | V#1: Yes (n.i.); V#2: Yes (n.i.); V#3: Yes (n.i.)                     | Yes | xx.04.2022 | BA.2            |
|       |   |        |    |       |      |                                                                       |     | 14.12.2023 | JN.1            |
| 10562 | 4 | Female | 48 | 45-75 | 1108 | V#1: BNT (B.1); V#2: BNT (B.1); V#3: BNT (B.1)                        | Yes | 15.07.2022 | BA.5            |
|       |   |        |    |       |      |                                                                       |     | xx.12.2023 | JN.1            |
| 10600 | 4 | Female | 36 | 65    | 2118 | V#1: BNT (B.1); V#2: Yes (n.i.); V#3: Yes (n.i.); V#4: BNT (B.1/BA.5) | Yes | 22.12.2022 | BQ.1.1, BF.7    |
|       |   |        |    |       |      |                                                                       |     | 12.12.2023 | JN.1            |
| 10653 | 4 | Female | 50 | 47-77 | 924  | V#1: AZD; V#2: BNT (B.1); V#3: BNT (B.1)                              | Yes | xx.10.2022 | BA.5            |
|       |   |        |    |       |      |                                                                       |     | xx.12.2023 | JN.1            |

Cohort 1: No Infection<sup>c</sup>/XBB.1.5 booster; Cohort 2: One infection//XBB.1.5 booster; Cohort 3: One infection/no XBB.1.5 booster; Cohort 4: Two infections/no XBB.1.5 booster. <sup>a</sup>: For samples without information on the exact date of infection/vaccination a range is provided; <sup>b</sup>: Anti-SARS-CoV-2 S1 IgG titers were determined against ancestral SARS-CoV-2; <sup>c</sup>: SARS-CoV-2 infection-free status of cohort 1 was confirmed by ELISA (= anti-NCP IgG-negative). Abbreviations: AZD, AZD1222/Vaxzevria; BNT (B.1), BNT162b2/Comirnaty; BNT (B.1/BA.5), Comirnaty Original / Omicron BA.4-5; BNT (XBB.1.5) Comirnaty XBB.1.5; MOD (B.1), Spikevax; BAU/ml, binding antibody units per mL; ID, identifier; IgG, immunoglobulin G; V#, vaccination; n.a., not applicable; n.i., no information available. Of note, no information on the batch numbers for the respective vaccines has been documented.
